# Supplementary material for: Ultra-rapid pattern formation of block copolymers with a high-χ parameter in immersion annealing induced by a homopolymer
Source: Royal Society of Chemistry journal article supplement (doi:10.1039/c6ra00350h), 2016-01-01
Supplement: c6ra00350h1.pdf [file c6ra00350h1.pdf]

## Supporting Information

### Ultra-rapid Pattern Formation of Block Copolymers with a high- $\chi$ parameter in the Immersion Annealing Induced by a Homopolymer

Myung Jin Kim<sup>a†</sup>, Woon Ik Park<sup>b†</sup>, Young Joong Choi<sup>c</sup>, Yun Kyung Jung<sup>d</sup>, and Kwang Ho Kim<sup>b,c\*</sup>

<sup>†</sup> These authors contributed equally to this work.

<sup>a</sup>School of Convergence Science, Pusan National University, Busandaehak-ro 63beon-gil, Geumjeong-gu, Busan 609-735, Republic of Korea

<sup>b</sup>Global Frontier R&D Center for Hybrid Interface Materials (HIM), Busandaehak-ro 63beon-gil, Geumjeong-gu, Busan 609-735, Republic of Korea

<sup>c</sup>School of Materials Science and Engineering, Pusan National University, Busandaehak-ro 63beon-gil, Geumjeong-gu, Busan 609-735, Republic of Korea

<sup>d</sup>School of natural science, Ulsan National Institute of Science and Technology (UNIST), UNIST-gil 50, Eonyang-eup, Ulju-gun, Ulsan 689-798, South Korea

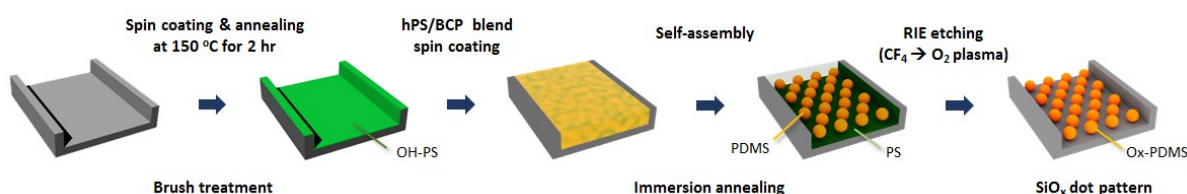

**Figure S1.** Schematic of the process sequence for the directed self-assembly of hPS/PS-*b*-PDMS blend in the immersion annealing.

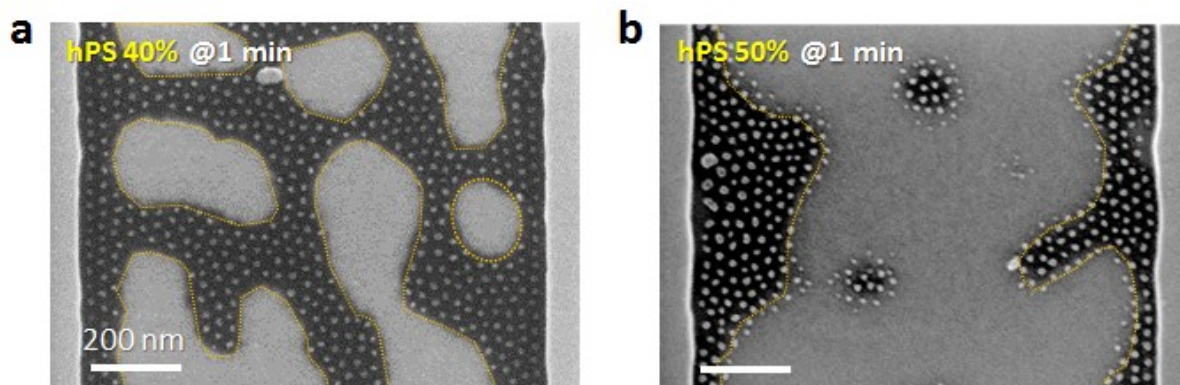

**Figure S2.** Self-assembled morphologies of the SD55 BCP with an excessive addition of hPS annealed at a fixed  $V_{\text{tol}}/V_{\text{eth}}$  ratio of 0.43 for one minute. (a) hPS 40%. (b) hPS 50%.

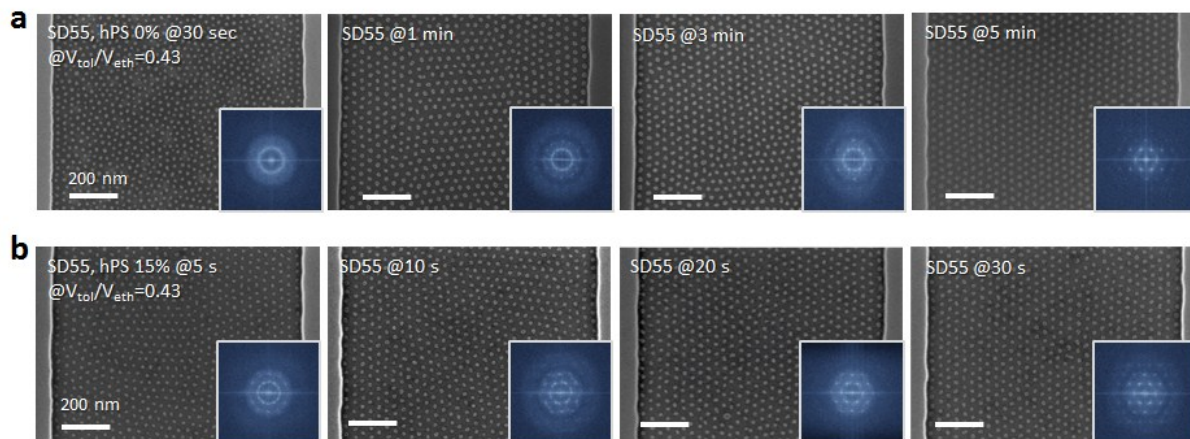

**Figure S3.** Time-evolution of the self-assembled of pure SD55 and hPS (15%)/SD55 blend when  $V_{\text{tol}}/V_{\text{eth}} = 0.43$ . (a) Pure SD55 BCP (hPS @ 0%). (b) hPS (15%)/ SD55 BCP blend.

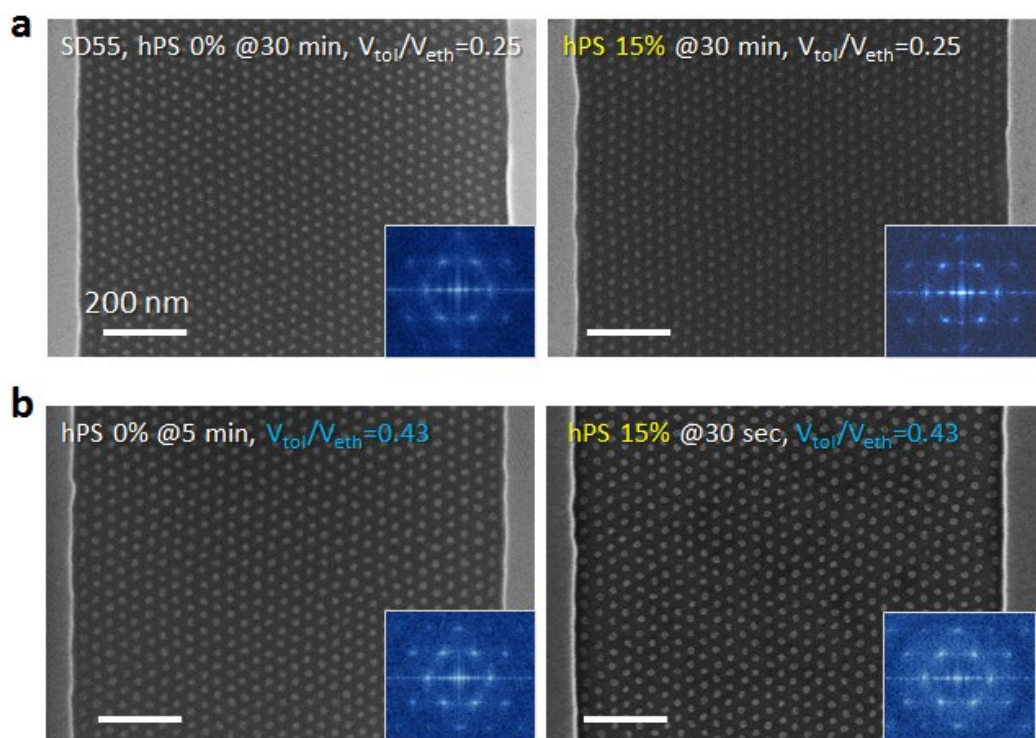

**Figure S4.** Comparison of the self-assembled dot patterns of pure SD55 and hPS (15%)/SD55 BCP blend when  $V_{tol}/V_{eth} =$  (a) 0.25 and (b) 0.43.
